# Supplementary material for: Comprehensive population-wide analysis of Lynch syndrome in Iceland reveals founder mutations in MSH6 and PMS2
Source: PubMed Central journal article supplement (PMC5418568; doi:10.1038/ncomms14755), 2017-05-03
Supplement: ncomms14755-s1.pdf [file ncomms14755-s1.pdf]

Supplementary Figure 1

A - *MSH6* p.Val282Thrfs\*10:

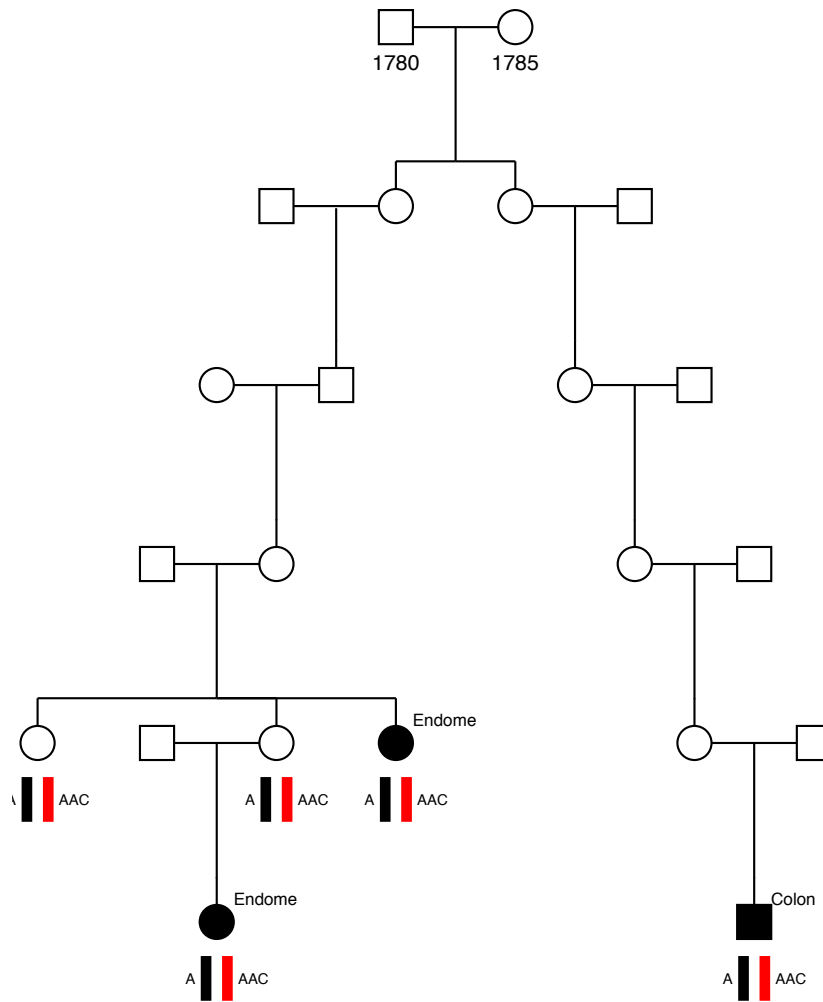

**B - MSH6 p.Phe1088Leufs\*5:**

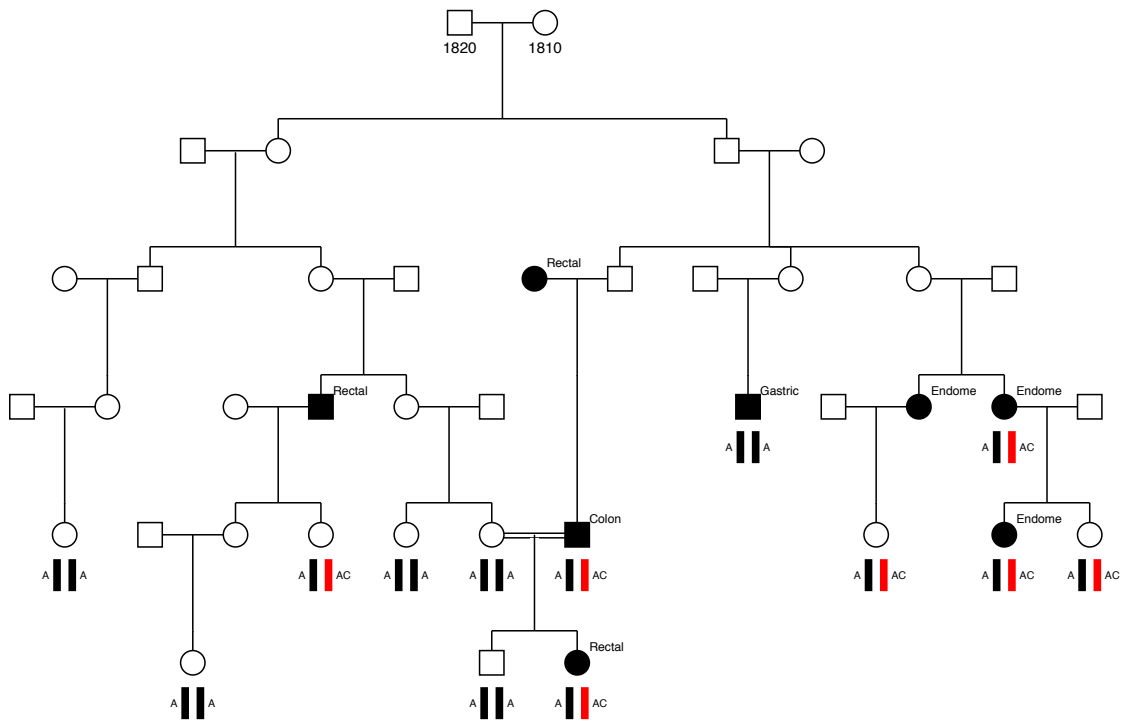

C - *MSH6* p.Arg1172Lysfs\*5:

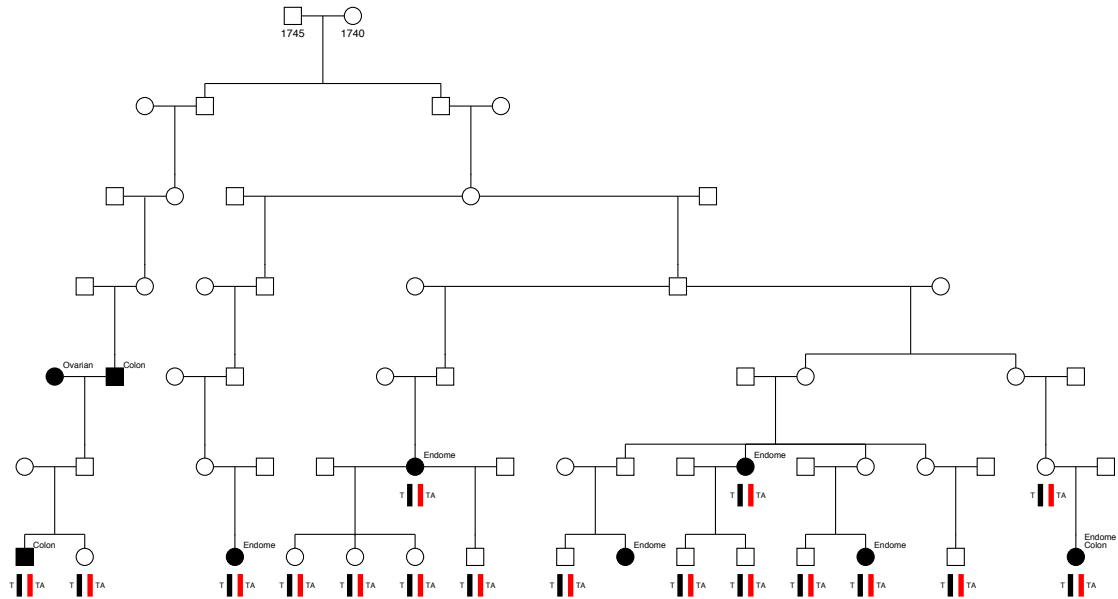

**D - *MSH2* p.Tyr815\*:**

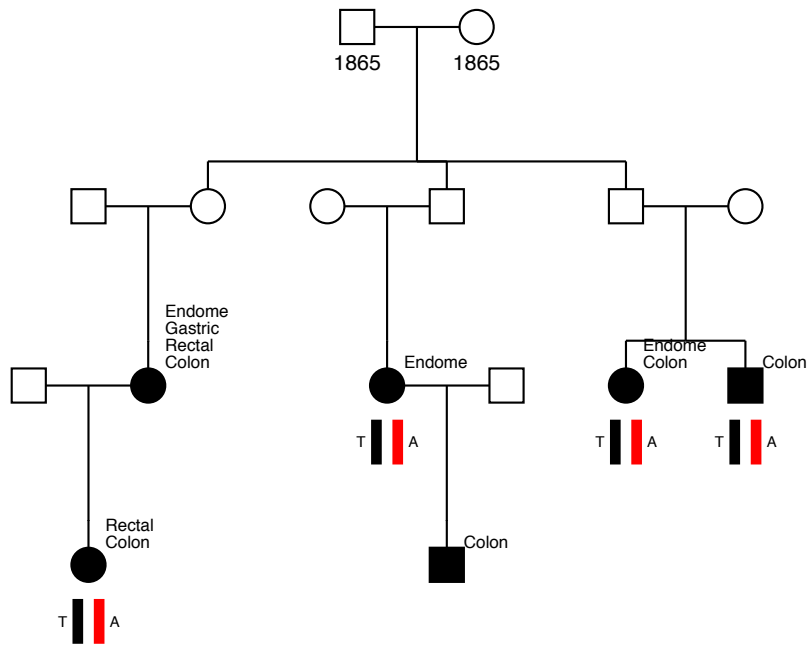

Families with private mutations. The wild-type allele (black) and haplotype allele linked to the mutation (red) are shown. The genotyped individuals are shown with letters representing the hotspot. Black circles/squares represent cancer cases. Panel A shows the family carrying *MSH6* p.Val282Thrfs\*10 (AAC), panel B the family carrying *MSH6* p.Phe1088Leufs\*5 (AC), panel C the family carrying *MSH6* p.Arg1172Lysfs\*5 (TA) and panel D the family carrying *MSH2* p.Tyr815\* (A).

**Supplementary Table 1: Validation of imputation through direct genotyping of imputed heterozygous carriers and imputed wild type homozygotes**

| Direct genotyping | <i>PMS2</i> p.Pro246Cysfs*3 (Freq=0.234%) |     | <i>MSH6</i> p.Leu585Pro (Freq=0.08%) |     | <i>PMS2</i> p.Met1? (Freq=0.092%) |     |
|-------------------|-------------------------------------------|-----|--------------------------------------|-----|-----------------------------------|-----|
|                   | Imputation                                |     | Imputation                           |     | Imputation                        |     |
|                   | wt                                        | het | wt                                   | het | wt                                | het |
| wt <sup>a</sup>   | 15,540                                    | 0   | 130                                  | 0   | 2963                              | 0   |
| het <sup>b</sup>  | 0                                         | 49  | 1                                    | 62  | 1                                 | 14  |

Freq=population-based carrier frequency; het=heterozygous; wt=wildtype.

Counts correspond to individuals where direct genotyping was successful; genotyping success rate was 91% for *PMS2* p.Pro246Cysfs\*3, 92% for *MSH6* p.Leu585Pro and 97% for *PMS2* p.Met1?.

<sup>a</sup>Homozygous wild type carriers

<sup>b</sup>Heterozygous carriers

**Supplementary Table 2: Patient and tumor characteristics in Lynch syndrome cases**

| Study ID | Age, sex | Location | Histology, grade   | Stage | Absent stains on IHC       | Germline mutation                    |
|----------|----------|----------|--------------------|-------|----------------------------|--------------------------------------|
| 339      | 67 M     | R        | Mucinous, G NK     | I     | MLH1/PMS2                  | <i>MLH1</i> translocation            |
| 472      | 79 M     | R        | Adenocarcinoma, G2 | IIIB  | MSH6                       | <i>MSH6</i> p.Val282Thrfs*10         |
| 357      | 68 M     | L        | Adenocarcinoma, G3 | IIIC  | MSH6                       | <i>MSH6</i> p.Phe1088Leufs*5         |
| 172      | 56 M     | R        | Adenocarcinoma, G2 | IIIB  | MSH6                       | <i>MSH6</i> p.Arg1172Lysfs*5         |
| 427      | 65 M     | R        | Mucinous, G2       | IVA   | PMS2                       | <i>PMS2</i> p.Glu705Lys              |
| 1057     | 55 M     | R        | Adenocarcinoma, G3 | IVA   | PMS2                       | <i>PMS2</i> p.Asn71Aspfs*4           |
| 960      | 75 F     | R        | Adenocarcinoma, G2 | IIA   | MSH6                       | <i>MSH6</i> p.Leu585Pro              |
| 736      | 60 M     | L        | Mucinous, G2       | IIA   | MSH6                       | <i>MSH6</i> p.Leu585Pro              |
| 438      | 55 M     | Rec      | Mucinous, G2       | IIA   | MSH6                       | <i>MSH6</i> p.Leu585Pro              |
| 455      | 74 F     | L        | Adenocarcinoma, G3 | IIA   | MSH6                       | <i>MSH6</i> p.Leu585Pro              |
| 508      | 47 M     | R        | Adenocarcinoma, G3 | IIA   | MSH2/MSH6                  | <i>MSH6</i> p.Leu585Pro              |
| 900      | 41 M     | Rec      | Adenocarcinoma, G2 | I     | Normal (MSH6 5%)           | <i>MSH6</i> p.Leu585Pro              |
| 786*     | 63 M     | L        | Mucinous, G2       | IIC   | Normal (MSH6 weak, 1-5%)   | <i>MSH6</i> p.Leu585Pro              |
| 30*      | 57 M     | L        | Mucinous, G2       | IIA   | Normal (MSH6 weak, 5%)     | <i>MSH6</i> p.Leu585Pro              |
| 94*      | 72 F     | L        | Adenocarcinoma, G2 | IIA   | Normal (MSH6 weak, 20-30%) | <i>MSH6</i> p.Leu585Pro              |
| 1245     | 40 F     | R        | Adenocarcinoma, G2 | IIA   | MSH6/PMS2                  | <i>PMS2</i> p.Pro246Cysfs*3          |
| 895      | 30 F     | Rec      | Adenocarcinoma, G2 | I     | PMS2                       | Presumed <i>PMS2</i> p.Pro246Cysfs*3 |
| 667      | 86 M     | L        | Mucinous, G NK     | IIB   | MSH2/6/PMS2                | <i>PMS2</i> p.Pro246Cysfs*3          |
| 912      | 55 M     | R        | Adenocarcinoma, G2 | I     | PMS2                       | <i>PMS2</i> p.Pro246Cysfs*3          |
| 923      | 63 M     | R        | Adenocarcinoma, G2 | IIA   | PMS2                       | <i>PMS2</i> p.Pro246Cysfs*3          |
| 363      | 79 M     | R        | Adenocarcinoma, G2 | IIA   | PMS2                       | <i>PMS2</i> p.Pro246Cysfs*3          |
| 268      | 52 M     | R        | Adenocarcinoma, G2 | I     | PMS2                       | <i>PMS2</i> p.Pro246Cysfs*3          |
| 231      | 62 M     | L        | Adenocarcinoma, G2 | IIA   | PMS2                       | <i>PMS2</i> p.Pro246Cysfs*3          |

|       |      |     |                    |     |        |                             |
|-------|------|-----|--------------------|-----|--------|-----------------------------|
| 210   | 72 M | R   | Adenocarcinoma, G2 | IIC | PMS2   | <i>PMS2 p.Pro246Cysfs*3</i> |
| 99    | 50 M | R   | Adenocarcinoma, G2 | IIA | PMS2   | <i>PMS2 p.Pro246Cysfs*3</i> |
| 1250* | 59 M | L   | Adenocarcinoma, G2 | I   | Normal | <i>PMS2 p.Pro246Cysfs*3</i> |
| 873*  | 64 M | Rec | Adenocarcinoma, G2 | IIA | Normal | <i>PMS2 p.Pro246Cysfs*3</i> |

---

\*These cases had tumor sent for ColoSeq (Results in Table 4).

F=female; G=grade; IHC=immunohistochemistry; L=left; LS=Lynch syndrome; M=male, NK=not known; R=right; Rec=rectum

**Supplementary Table 3: Haplotype analysis in carriers of the *PMS2* frameshift mutation**

|            | rs2228007<br>chr7:5987234 | rs12702460<br>chr7:5993117 | rs7788441<br>chr7:5996313 | rs7805798<br>chr7:5996374 | rs7793254<br>chr7:5997171 | Indel<br>chr7:5997387 | rs12702463<br>chr7:5998548 | rs6949598<br>chr7:5998852 |
|------------|---------------------------|----------------------------|---------------------------|---------------------------|---------------------------|-----------------------|----------------------------|---------------------------|
| Carrier 1  | C                         | A                          | G                         | T                         | G                         | Yes                   | C                          | A                         |
| Carrier 2  | C                         | A                          | G                         | T                         | G                         | Yes                   | C                          | A                         |
| Carrier 3  | C                         | A                          | G                         | T                         | G                         | Yes                   | C                          | A                         |
| Carrier 4  | C                         | A                          | G                         | T                         | G                         | Yes                   | C                          | A                         |
| Carrier 5  | C                         | A                          | G                         | T                         | G                         | Yes                   | C                          | A                         |
| Carrier 6  | C                         | A                          | G                         | T                         | G                         | Yes                   | C                          | A                         |
| Carrier 7  | C                         | A                          | G                         | T                         | G                         | Yes                   | C                          | A                         |
| Carrier 8  | C                         | A                          | G                         | T                         | G                         | Yes                   | C                          | A                         |
| Carrier 9  | C                         | A                          | G                         | T                         | G                         | Yes                   | C                          | A                         |
| Carrier 10 | C                         | A                          | G                         | T                         | G                         | Yes                   | C                          | A                         |
| Carrier 11 | C                         | A                          | G                         | T                         | G                         | Yes                   | C                          | A                         |
| Carrier 12 | C                         | A                          | G                         | T                         | G                         | Yes                   | C                          | A                         |
| MAF*       | C=3.39%                   | A=15.82%                   | A=31.16%                  | T=15.70%                  | G=26.88                   | 0.117%                | C=15.75%                   | A=15.85%                  |

Hg38 location displayed. Haplotype obtained from Clendenning 2008.<sup>20</sup>

\*Minor allelic frequency in the Icelandic population.



**Supplementary Table 4: Icelandic Lynch syndrome mutations and cancer risks**

|                                                              | <b>Cancer type</b>                                | <b>Odds ratio</b> | <b>95% CI</b> | <b>p-value</b>        | <b>Cases</b>         | <b>Controls</b> | <b>Info</b> |
|--------------------------------------------------------------|---------------------------------------------------|-------------------|---------------|-----------------------|----------------------|-----------------|-------------|
| <i>MSH6</i> p.Leu585Pro<br>Freq: 0.080% <sup>1)</sup>        | Bladder cancer                                    | 1.7               | 0.35-8.1      | 5.12x10 <sup>-1</sup> | 1888                 | 291,370         | 0.92        |
|                                                              | Breast cancer                                     | 0.96              | 0.26-3.6      | 9.48x10 <sup>-1</sup> | 5727                 | 312,993         |             |
|                                                              | Esophageal cancer                                 | 1.3               | 0.03-57.8     | 8.86x10 <sup>-1</sup> | 620                  | 205,517         |             |
|                                                              | Gallbladder/bile duct cancer                      | 3.0               | 0.09-97.4     | 5.3x10 <sup>-1</sup>  | 349                  | 233,076         |             |
|                                                              | Gastric cancer                                    | 2.1               | 0.5-8.6       | 3.1x10 <sup>-1</sup>  | 2671                 | 240,521         |             |
|                                                              | Liver cancer                                      | 5.4               | 0.43-67.6     | 1.9x10 <sup>-1</sup>  | 273                  | 301,484         |             |
|                                                              | Ovarian cancer                                    | 3.1               | 0.38-25.0     | 2.95x10 <sup>-1</sup> | 779                  | 121,299         |             |
|                                                              | Pancreatic cancer                                 | 2.4               | 0.26-22.5     | 4.4x10 <sup>-1</sup>  | 1177                 | 200,727         |             |
|                                                              | Prostate cancer                                   | 1.5               | 0.49-4.5      | 4.8x10 <sup>-1</sup>  | 5274                 | 97,905          |             |
|                                                              | Testicular cancer                                 | 4.4               | 0.37-52.5     | 2.44x10 <sup>-1</sup> | 300                  | 151,991         |             |
| <i>PMS2</i><br>p.Pro246Cysfs*3<br>Freq: 0.234% <sup>2)</sup> | Bladder cancer                                    | 1.0               | 0.35-2.9      | 9.9x10 <sup>-1</sup>  | 1888                 | 291,370         | 0.99        |
|                                                              | Breast cancer                                     | 1.9               | 1.1-3.4       | 3.10x10 <sup>-2</sup> | 5727                 | 312,993         |             |
|                                                              | Brain cancer (glioma)                             | 2.0               | 0.45-9.3      | 3.6x10 <sup>-1</sup>  | 702                  | 358,789         |             |
|                                                              | Esophageal cancer                                 | 2.2               | 0.52-9.1      | 2.86x10 <sup>-1</sup> | 620                  | 205,517         |             |
|                                                              | Gallbladder/bile duct cancer                      | 0.49              | 0.006-42.7    | 7.6x10 <sup>-1</sup>  | 349                  | 233,076         |             |
|                                                              | Gastric cancer                                    | 1.7               | 0.72-4.0      | 2.2x10 <sup>-1</sup>  | 2671                 | 240,521         |             |
|                                                              | Liver cancer                                      | 1.1               | 0.02-51.7     | 9.6x10 <sup>-1</sup>  | 273                  | 301,484         |             |
|                                                              | Prostate cancer                                   | 1.3               | 0.69-2.5      | 4.1x10 <sup>-1</sup>  | 5274                 | 97,905          |             |
|                                                              | Testicular cancer                                 | 1.5               | 0.18-12.6     | 7.0x10 <sup>-1</sup>  | 300                  | 151,991         |             |
|                                                              | <i>PMS2</i> p.Met1?<br>Freq: 0.092% <sup>3)</sup> | Bladder cancer    | 0.53          | 0.085-3.27            | 4.9x10 <sup>-1</sup> | 1888            | 291,370     |
| Brain cancer (glioma)                                        |                                                   | 0.60              | 0.007-47.8    | 8.2x10 <sup>-1</sup>  | 702                  | 358,789         |             |
| Breast cancer                                                |                                                   | 0.84              | 0.29-2.5      | 7.6x10 <sup>-1</sup>  | 5727                 | 312,993         |             |

|                              |      |           |                       |      |         |
|------------------------------|------|-----------|-----------------------|------|---------|
| Gallbladder/bile duct cancer | 0.78 | 0->100    | $9.5 \times 10^{-1}$  | 349  | 233,076 |
| Gastric cancer               | 2.4  | 0.88-6.7  | $8.54 \times 10^{-2}$ | 2671 | 240,521 |
| Liver cancer                 | 3.6  | 0.33-38.2 | $3.0 \times 10^{-1}$  | 273  | 301,484 |
| Pancreatic cancer            | 1.4  | 0.21-8.82 | $7.5 \times 10^{-1}$  | 1177 | 200,727 |
| Prostate cancer              | 0.83 | 0.28-2.5  | $7.4 \times 10^{-1}$  | 5274 | 97,905  |
| Testicular cancer            | 7.4  | 0.8-68.4  | $7.8 \times 10^{-2}$  | 300  | 151,991 |

---

CI=confidence interval; Freq=frequency; LS=Lynch syndrome. Info represents the imputation quality of the variant. p-values were obtained by logistic regression analysis.

- 1) No association seen with adrenal gland, renal pelvis or ureteral cancer.
- 2) No association seen with adrenal gland, renal pelvis, ureteral and pancreatic cancer.
- 3) No association seen with adrenal gland, esophageal, renal pelvis and ureteral cancer.

In total 16 cancers were tested for each of the mutations. Significant p-value  $< 3.13 \times 10^{-3}$  to correct for multiple tests.

**Supplementary Table 5: Primer sequences used for Sanger sequencing of individual variants**

| <b>Gene</b> | <b>Protein change</b> | <b>Hg38 location</b> | <b>Forward</b>         | <b>Reverse</b>         |
|-------------|-----------------------|----------------------|------------------------|------------------------|
| <i>MSH2</i> | p.Tyr815*             | chr2:47478506        | CTGCCTGGCCAATCAGATA    | AAGGCAATTACTGATGATTCAA |
| <i>MSH6</i> | p.Val282Thrfs*10      | chr2:47798826        | TGACATTGGTGGCTCTGATG   | CTTCCGCTTTCGAGCAACTT   |
| <i>MSH6</i> | p.Leu585Pro           | chr2:47799737        | GATGATCGCCATTGTTTCGAG  | GCCGGGTATCAGACCTTCT    |
| <i>MSH6</i> | p.Phe1088Leufs*5      | chr2:47803500        | GCTGATAAAACCCCAAACG    | TTTGCCATTTTCCTGCTCT    |
| <i>MSH6</i> | p.Arg1172Lysfs*5      | chr2:47804984        | GCCTCTGTCTCTTTAGCCTCAA | TTCTGTCTGAGGCACCAAGTCT |
| <i>PMS2</i> | Glu705Lys             | chr7:5982885         | GGGGAGTCTGGGAATGAACA   | GAGCCAAGATTGTGCCATTG   |
| <i>PMS2</i> | p.Pro246Cysfs*3       | chr7:5997387         | AAAAAGATTATGCAGAGCATCG | TCAGTTGCAAAGCCTCATTC   |
| <i>PMS2</i> | p.Asn71Aspfs*4        | chr7:6004007         | CCCGAAAGCCAAAAGTTTCA   | TGATAGCATGGGTCCGTTTTT  |
| <i>PMS2</i> | p.Met1?               | chr7:6009018         | ATGCCGTGGGTCTCAAAGAG   | GGAGGGAAC TTCCAGTCC    |
